# Supplementary material for: MEIS2 is essential for neuroblastoma cell survival and proliferation by transcriptional control of M-phase progression
Source: PubMed Central journal article supplement (PMC4540202; doi:10.1038/cddis.2014.370), 2014-09-11
Supplement: cddis2014370x1.pdf [file cddis2014370x1.pdf]

# MEIS2 is essential for neuroblastoma cell survival and proliferation by transcriptional control of M phase progression

Yunhong Zha<sup>1</sup>, Yingfeng Xia<sup>1,2</sup>, Jane Ding<sup>2</sup>, Jeong-Hyeon Choi<sup>2,3</sup>, Liqun Yang<sup>7</sup>, Zheng Dong<sup>4</sup>, Chunhong Yan<sup>2,5</sup>, Shuang Huang<sup>5</sup>, and Han-Fei Ding<sup>2,6</sup>

<sup>1</sup>Department of Neurology, the First Hospital of Yichang, Three Gorges University College of Medicine, Yichang, 443000, China; <sup>2</sup>Cancer Center, <sup>3</sup>Department of Biostatistics and Epidemiology, <sup>4</sup>Department of Cellular Biology and Anatomy, <sup>5</sup>Department of Biochemistry and Molecular Biology, <sup>6</sup>Department of Pathology, Medical College of Georgia, Georgia Regents University, Augusta, Georgia 30912, USA; <sup>7</sup>State Key Laboratory of Silkworm Genome Biology, Institute of Sericulture and System Biology, Southwest University, Chongqing, 400716, China

## Supplementary Figures S1-S8 Supplementary Table S1

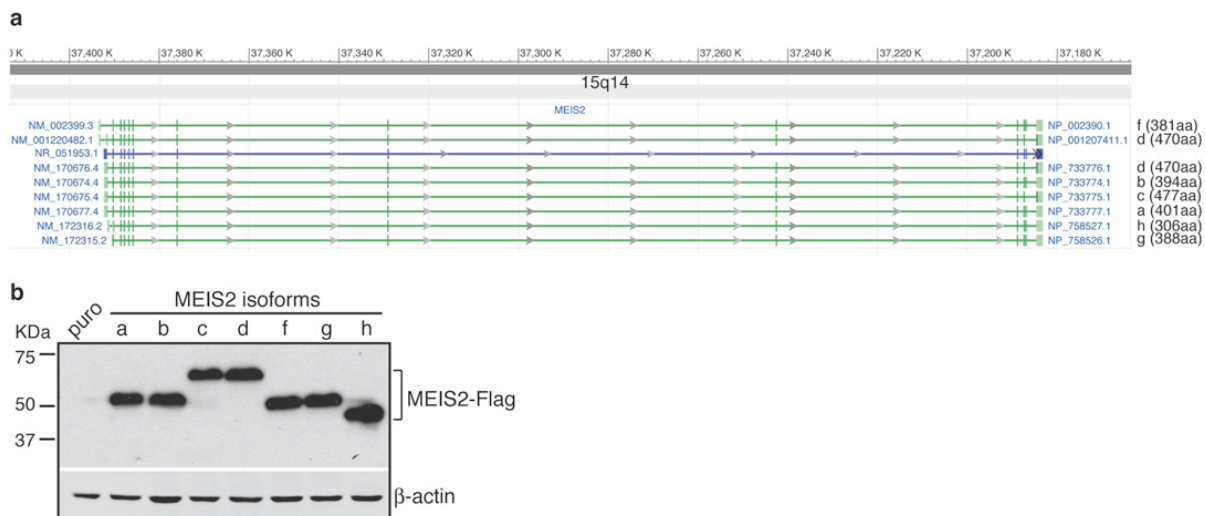

**Figure S1.** MEIS2 isoforms. **(a)** The human *MEIS2* gene and its isoforms (<http://www.ncbi.nlm.nih.gov/gene/4212>). The number of amino acid residues for each isoform is indicated. **(b)** Immunoblotting of Flag-tagged MEIS2 isoforms in 293FT cells transfected with pCDH-puro-based lentiviral constructs expressing individual MEIS2 isoforms. β-actin levels are shown as loading control.

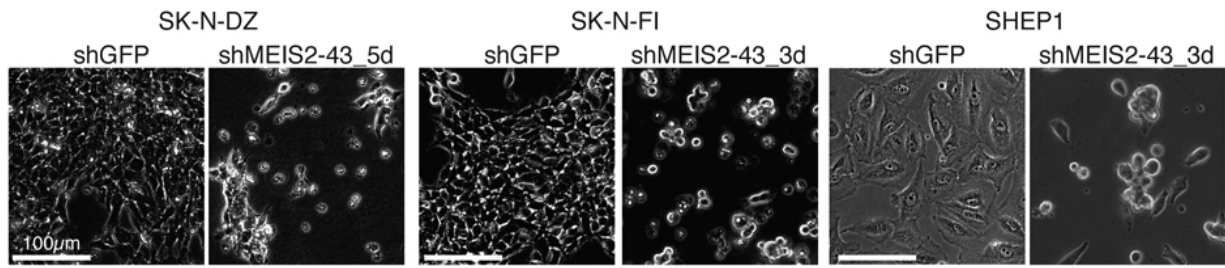

**Figure S2.** MEIS2 depletion induces cell death in the human neuroblastoma cell lines SK-N-DZ, SK-N-FI, and SHEP1.

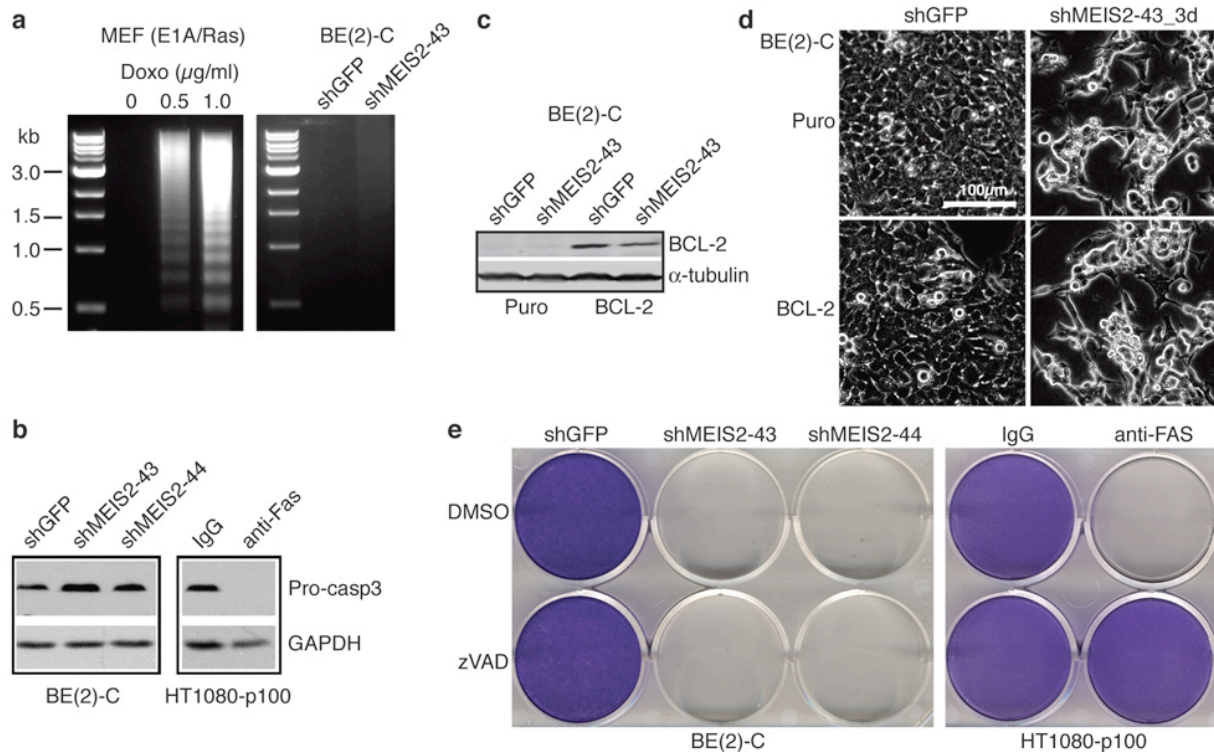

**Figure S3.** MEIS2 depletion induces non-apoptotic cell death. **(a)** DNA fragmentation assay showing no apoptosis-induced genomic DNA fragments in BE(2)-C cells following MEIS2 depletion. E1A/Ras-transformed mouse embryo fibroblasts (MEF), which are highly sensitive to the DNA-damage drug doxorubicin (Doxo), were used as positive control for apoptosis-induced genomic DNA fragmentation. **(b)** Immunoblotting showing no cleavage of pro-caspase 3 in BE(2)-C cells following MEIS2 depletion. The human fibrosarcoma HT1080 cells expressing NF- $\kappa$ B2 p100, which are highly sensitive to anti-Fas (CH11, 100 ng/ml)-triggered apoptosis, were used as positive control. **(c)** Immunoblotting of BCL-2 in BE(2)-C cells with or without BCL-2 overexpression or MEIS2 depletion. **(d)** Phase-contrast images showing no protection of MEIS2 depletion-induced cell death by BCL-2. **(e)** Crystal violet staining showing no protection of MEIS2 depletion-induced cell death by zVAD-FMK (10  $\mu\text{M}$ ). Anti-Fas-induced apoptosis was used as positive control.

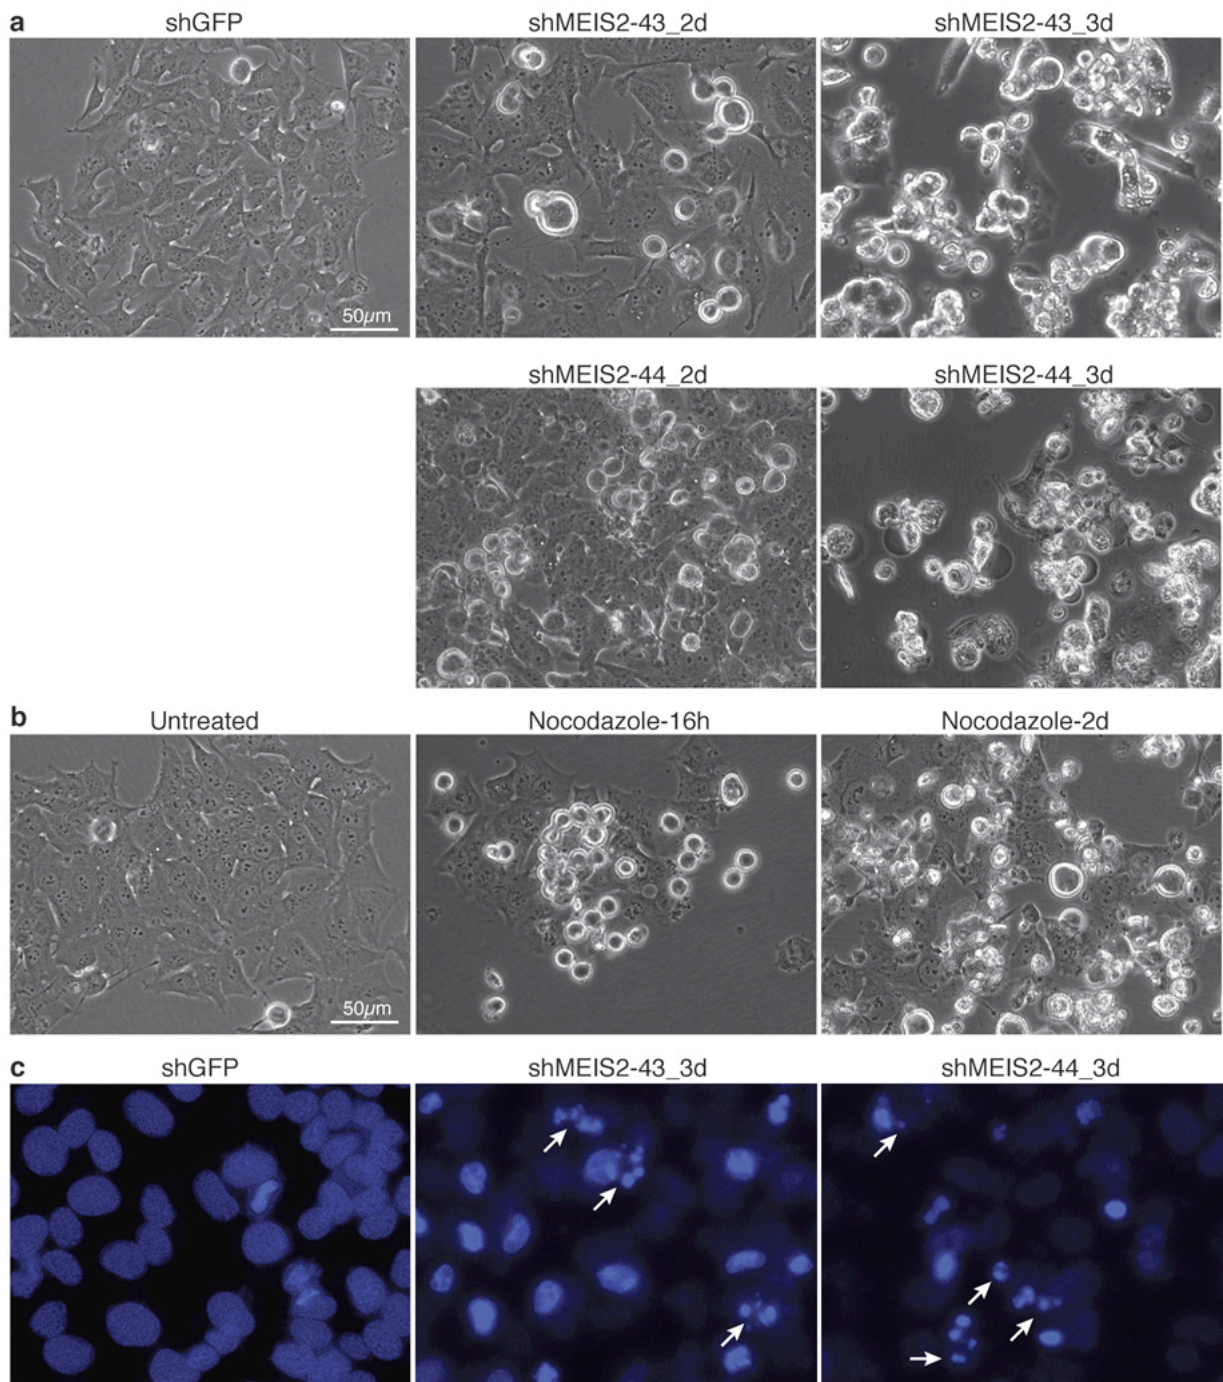

**Figure S4.** MEIS2 depletion induces cell death with micronucleation. **(a-b)** Phase-contrast images of BE(2)-C cells with MEIS2 depletion **(a)** or treated with Nocodazole **(b)**, an anti-cancer agent that induces M phase arrest by interfering with the polymerization of microtubules. **(c)** Hoechst 33342 staining of nuclei showing chromatin condensation and micronucleation (arrows) in BE(2)-C cells following infection with lentiviruses expressing shMEIS2-43 or shMEIS2-44.

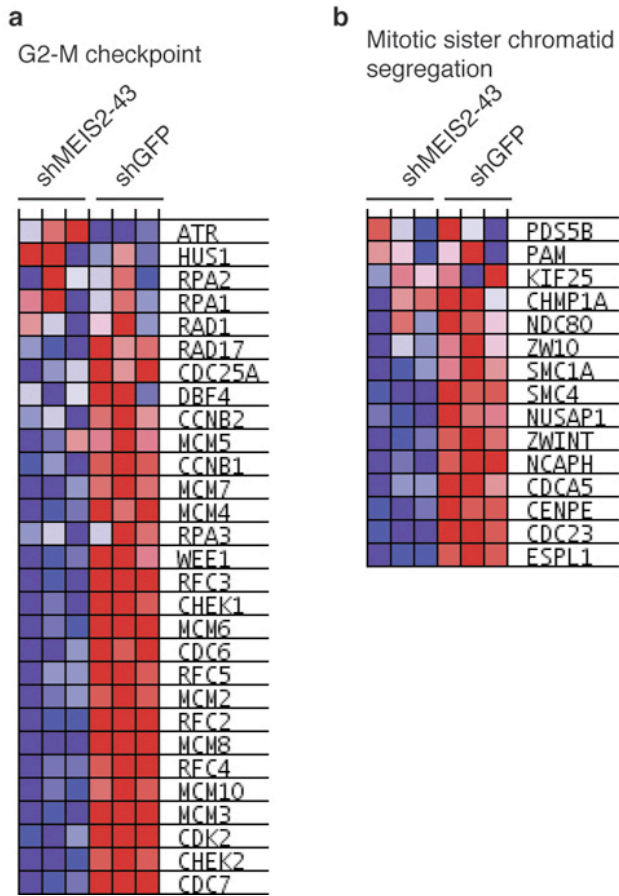

**Figure S5.** GSEA showing downregulation of genes involved in the G2-M checkpoint control (**a**) and mitotic sister chromatid segregation (**b**).

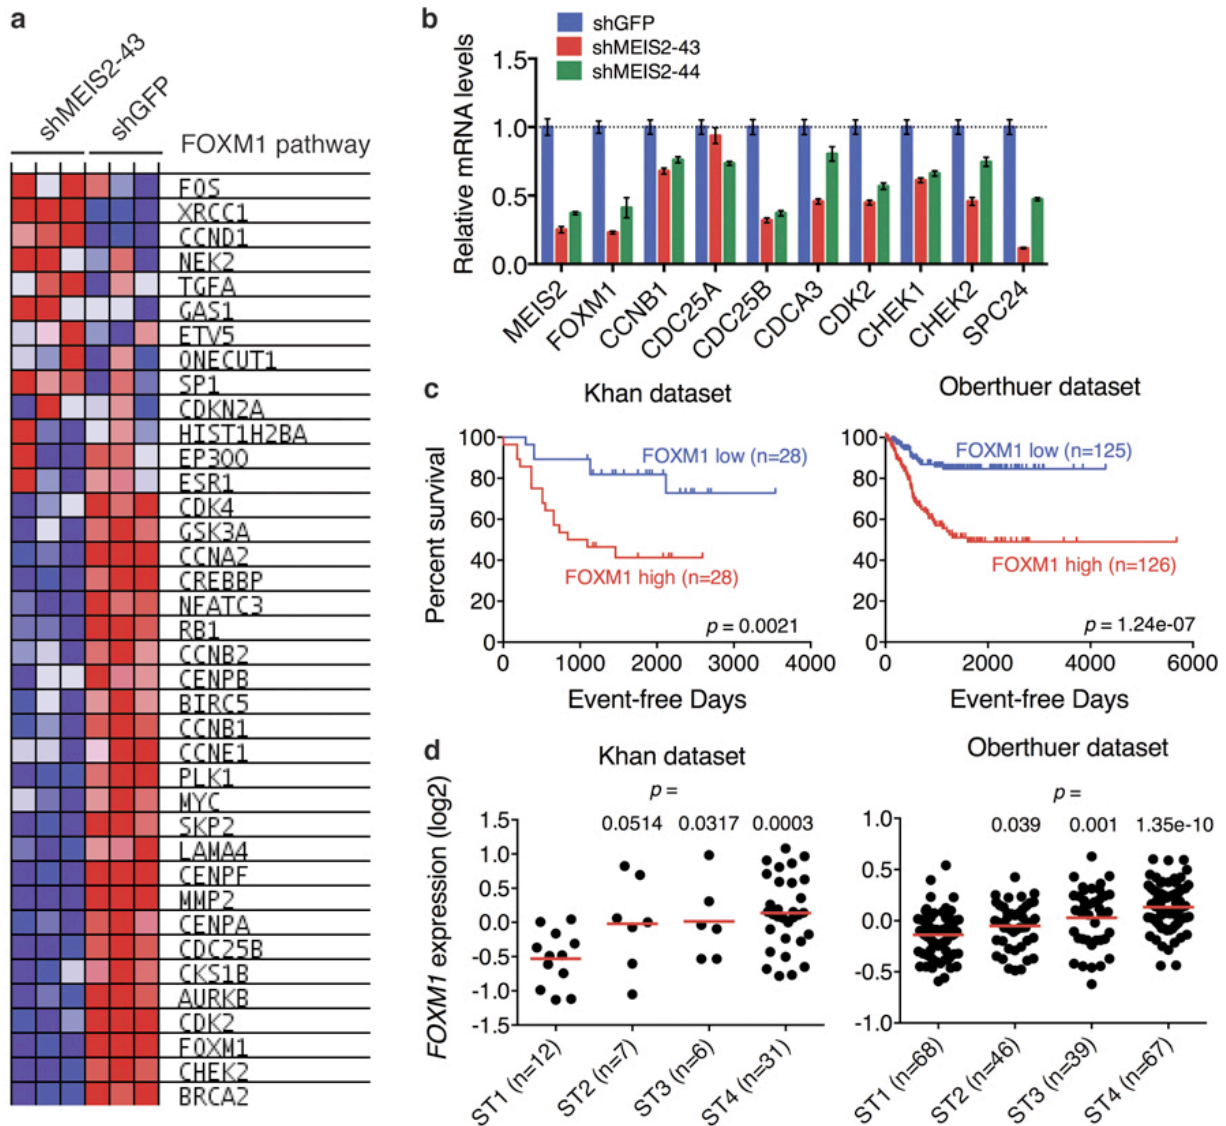

**Figure S6.** MEIS2 is essential for maintaining FOXM1 expression in neuroblastoma cells. **(a-b)** GSEA **(a)** and qRT-PCR analysis **(b)** showing downregulation of FOXM1 and its downstream target genes in BE(2)-C cells with MEIS2 depletion. Error bars, s.d. ( $n = 3$ ). **(c-d)** High FOXM1 expression is significantly associated with poor prognosis **(c)** and advanced tumor stages **(d)** in neuroblastoma patients. Data in **(c)** were analyzed with the log-rank test with  $p$  values indicated, and data in **(d)** (ST1 vs ST2, 3, or 4) were analyzed with two-tailed Student's  $t$ -test with  $p$  values indicated.

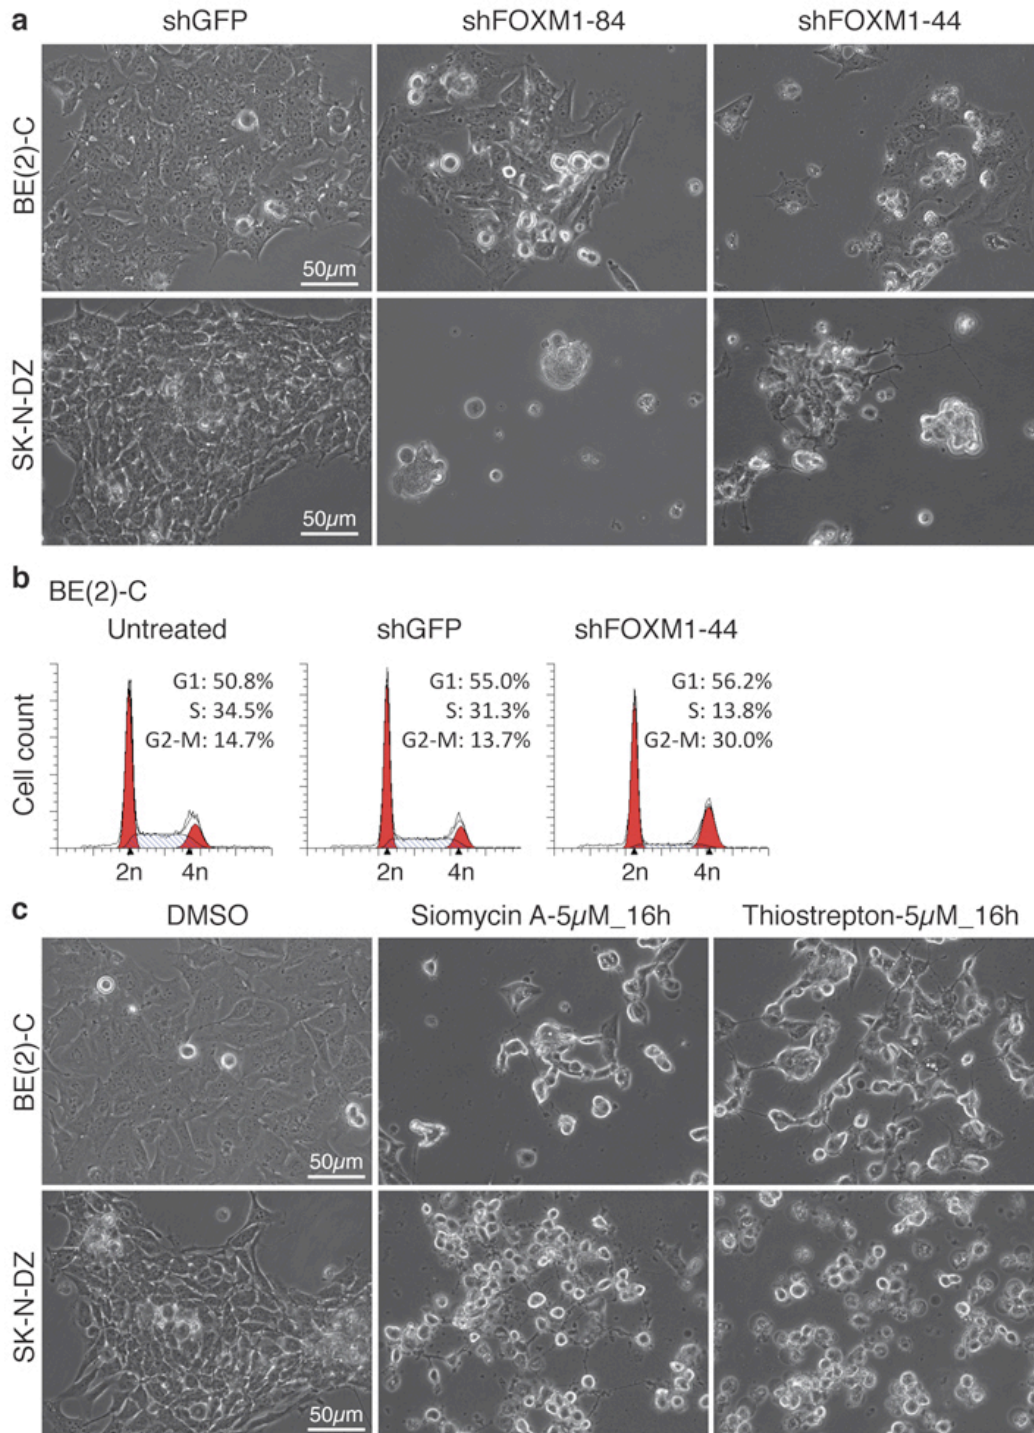

**Figure S7.** FOXM1 depletion or inhibition induces cell death with M phase arrest in neuroblastoma cells. **(a-b)** Micrographs **(a)** and cell cycle analysis of indicated neuroblastoma cell lines with FOXM1 depletion. **(c)** Micrographs of indicated neuroblastoma cell lines treated with FOXM1 inhibitors.

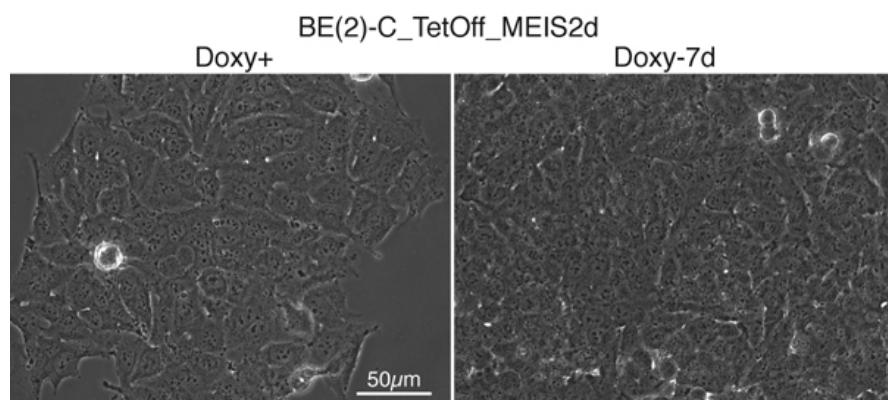

**Figure S8.** Micrographs of neuroblastoma BE(2)-C cells with or without inducible MEIS2d overexpression.



**Table S1. RT-PCR primers**

| <b>Primer set</b> | <b>Forward</b>            | <b>Reverse</b>          |
|-------------------|---------------------------|-------------------------|
| BMXB              | CACCAGAAACGAGCCTGCCTTA    | CTCAGGTCACACCAAGCATCAG  |
| CCNB1             | GACCTGTGTCAGGCTTTCTCTG    | GGTATTTTGGTCTGACTGCTTGC |
| CDC25A            | TCTGGACAGCTCCTCTCGTCAT    | ACTTCCAGGTGGAGACTCCTCT  |
| CDC25B            | AGAACCTCCTGGACAGTGACCA    | GCTGAACTTGCCCGTCAATAGG  |
| CDCA3             | GTTACCTAGTGCTGGCATCCT     | GGATCTGAGTCCTGGGCATGTT  |
| CDK2              | ATGGATGCCTCTGCTCTCACTG    | CCCGATGAGAATGGCAGAAAGC  |
| CENPA             | GGCGGAGACAAGGTTGGCTAAA    | GGCTTGCCAATTGAAGTCCACAC |
| CHEK1             | GTGTCAGAGTCTCCAGTGGAT     | GTTCTGGCTGAGAACTGGAGTAC |
| CHEK2             | GACCAAGAACCTGAGGAGCCTA    | GGATCAGATGACAGCAGGAGTTC |
| FOXM1             | ACTTTAAGCACATTGCCAAGC     | CGTGCAGGGAAAGGTTGT      |
| MEIS2             | GACCACGATGATGCAACC        | CCTGTGTCTTGCGCTAACTG    |
| RBBP4             | AGACTTGCGTCTCCGTGGACAT    | CCTCCTTTGGAACGGCACTGAT  |
| SPC24             | GGGATTATGAGTGTGAGCCAGG    | ACTCCAGAGGTAGTCGCTGATG  |
| B2M               | TGCTGTCTCCATGTTTGATGTATCT | TCTCTGCTCCCCACCTCTAAGT  |
